# Supplementary material for: Soluble sulfonated polybenzimidazoles containing phosphine oxide units as proton exchange membranes
Source: Royal Society of Chemistry journal article supplement (doi:10.1039/d3nj00796k), 2023-01-01
Supplement: d3nj00796k1.pdf [file d3nj00796k1.pdf]

## **Sulfonated polybenzimidazoles containing phosphine oxide units as proton exchange membranes**

Gang Wang,<sup>\*a</sup> Shuai Yang,<sup>a</sup> Bingyan Hua,<sup>a</sup> Mingxia Lu,<sup>a</sup> Jiaqi Kang,<sup>a</sup> Wenshuai Tang,<sup>a</sup>  
Hongliang Wei,<sup>a</sup> Xianxian Liu,<sup>a</sup> Lifeng Cui,<sup>\*b</sup> and Xiaodong Chen,<sup>\*b</sup>

<sup>a</sup> *College of Chemistry and Chemical Engineering, Henan University of Technology,  
Zhengzhou 450001, PR China*

<sup>b</sup> *College of Smart Energy, Shanghai Jiao Tong University, Shanghai 200240, PR China*

\* Corresponding authors. Email: gwang198@gmail.com (G. Wang); lcui@usst.edu.cn (L. Cui);  
chenxd@zjblab.com (X. Chen)

Figure captions

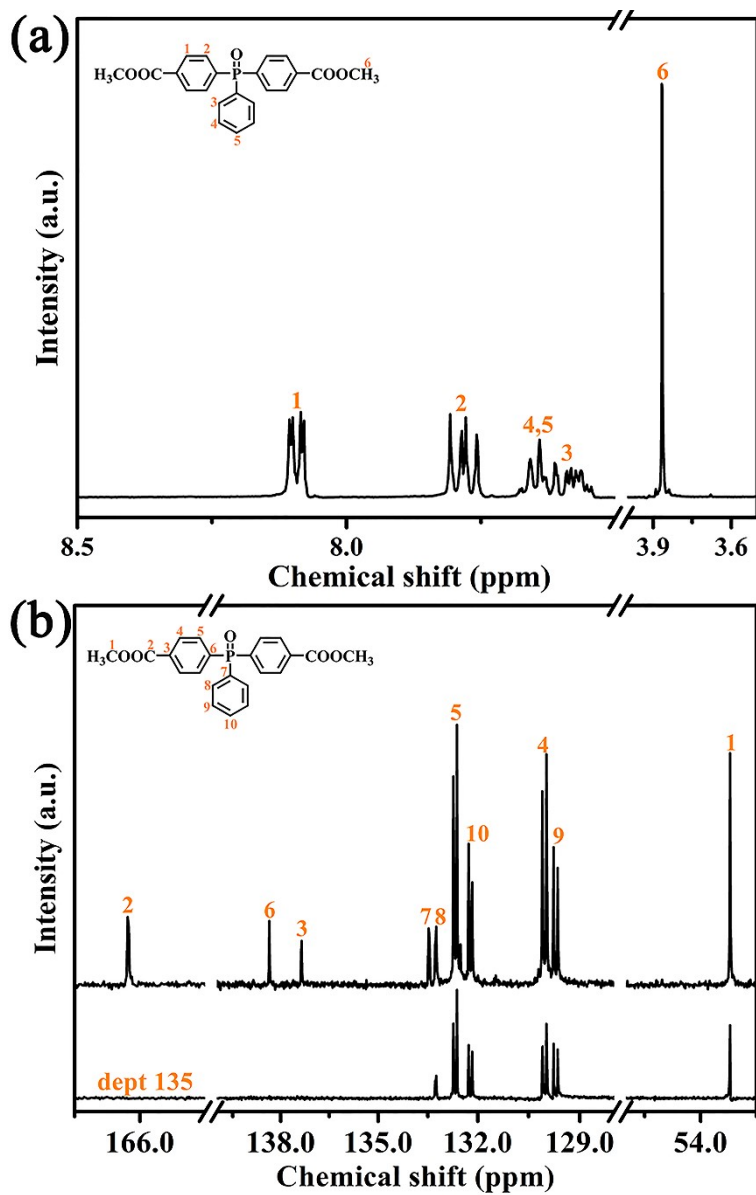

Fig. S1 (a)  $^1\text{H}$  NMR and (b)  $^{13}\text{C}$  NMR spectra of BMPO.

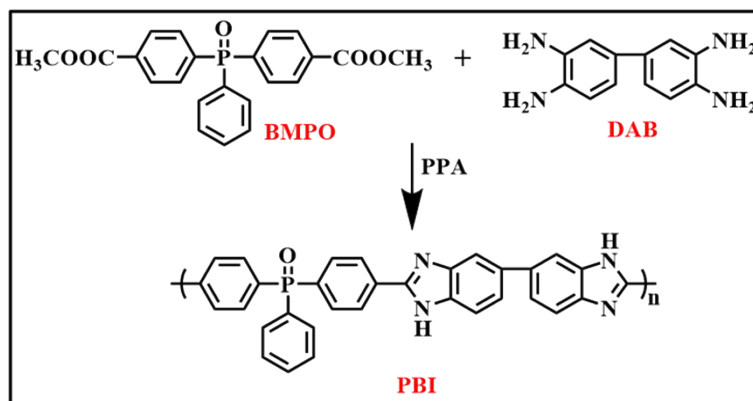

**Fig. S2** Scheme for the synthesis of PBI.

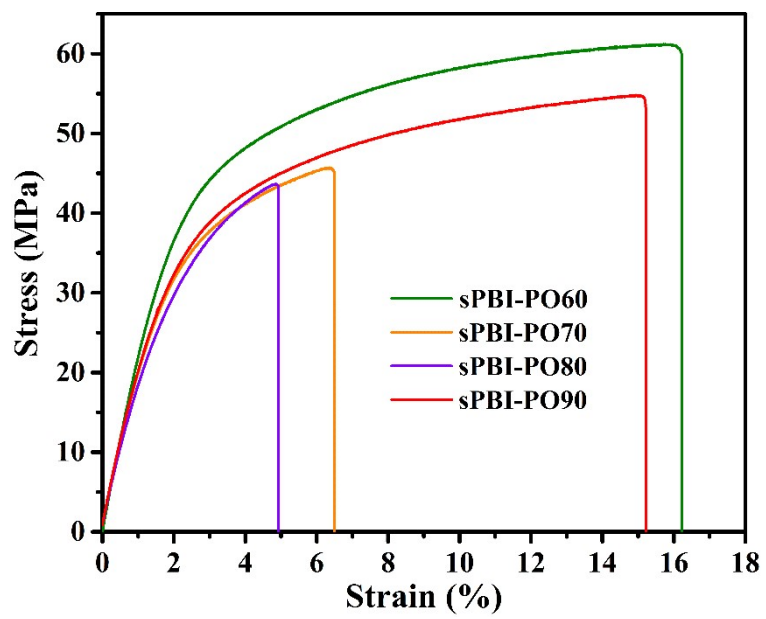

**Fig. S3** Stress-strain curves of sPBI-PO60, 70, 80, and 90.

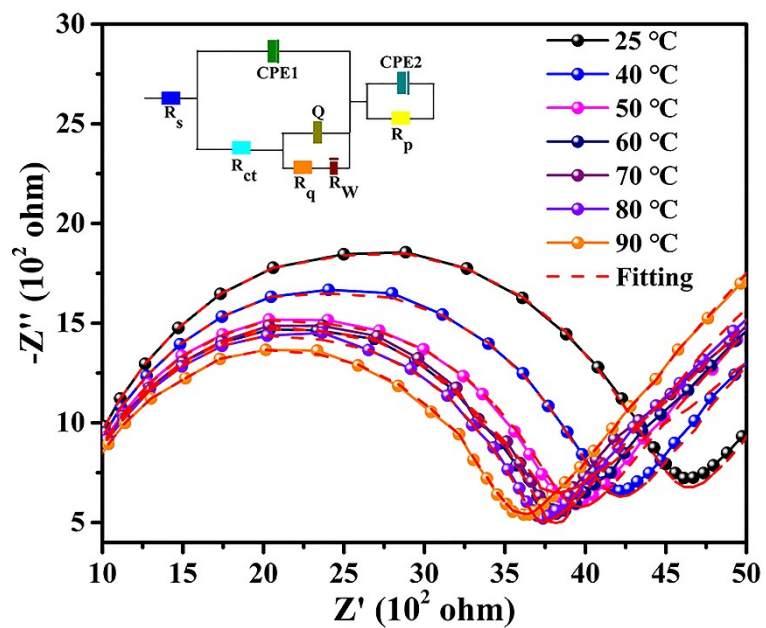

**Fig. S4** Nyquist plots and corresponding fit curves of sPBI-PO90-PPA membranes at different temperature and simulated equivalent circuit diagram.

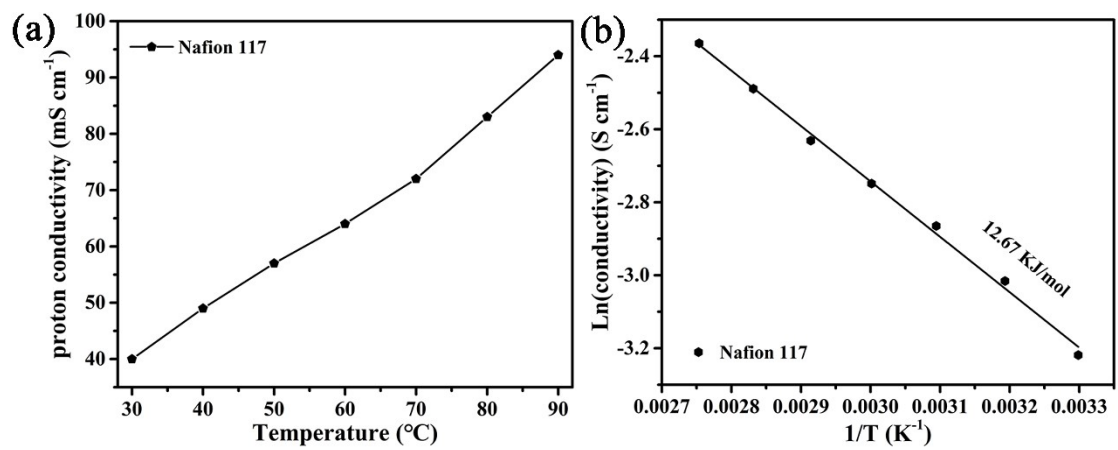

**Fig. S5** (a) Proton conductivity and (b) Arrhenius plot of Nafion 117.

## Table captions

**Table S1** Feed ratios, intrinsic viscosity, and yields of polycondensation

| Ionomers   | sBMPO/ BMPO / DAB<br>(molar ratio) | [ $\eta$ ] <sup>a</sup> | Yield |
|------------|------------------------------------|-------------------------|-------|
|            |                                    | (dL/g)                  | (%)   |
| PBI        | 0/100/100                          | 1.51                    | 95    |
| sPBI-PO60  | 60/40/100                          | 1.79                    | 94    |
| sPBI-PO70  | 70/30/100                          | 2.03                    | 96    |
| sPBI-PO80  | 80/20/100                          | 2.35                    | 94    |
| sPBI-PO90  | 90/10/100                          | 2.41                    | 94    |
| sPBI-PO100 | 100/0/100                          | - <sup>b</sup>          | 94    |

<sup>a</sup> The intrinsic viscosity of polymers in DMSO with 0.05 mol L<sup>-1</sup> LiBr at 30 °C.

<sup>b</sup> Poor solubility in DMSO cannot test exact intrinsic viscosity.

**Table S2** T<sub>d5</sub>, IEC, and oxidative stability of sPBI-PO membranes.

| Ionomers   | T <sub>d5</sub><br>(°C) | IEC (meq/g)    |                | Thickness<br>( $\mu$ m) | Residue <sup>a</sup><br>(%) | $\tau_1$ <sup>b</sup><br>(h) |
|------------|-------------------------|----------------|----------------|-------------------------|-----------------------------|------------------------------|
|            |                         | calculated     | measured       |                         |                             |                              |
| sPBI-PO60  | 491                     | 1.10           | 1.06           | 55                      | 98                          | >48                          |
| sPBI-PO70  | 490                     | 1.27           | 1.24           | 50                      | 97                          | >48                          |
| sPBI-PO80  | 488                     | 1.43           | 1.40           | 58                      | 96                          | >48                          |
| sPBI-PO90  | 485                     | 1.58           | 1.52           | 50                      | 95                          | >48                          |
| sPBI-PO100 | 480                     | - <sup>c</sup> | - <sup>c</sup> | - <sup>c</sup>          | - <sup>c</sup>              | - <sup>c</sup>               |

<sup>a</sup> Residual weight after 1 h soak in Fenton's reagent at 80 °C.

<sup>b</sup>  $\tau_1$  means the time when dissolving the membrane completely at 80 °C.

<sup>c</sup> Poor solubility in DMSO.

**Table S3** Solubility of the PBI and sPBI-PO ionomers.

| Ionomers   | DMSO | DMAC | NMP | DMF | Sulfolane | Methanol | water |
|------------|------|------|-----|-----|-----------|----------|-------|
| PBI        | +    | ±    | ±   | ±   | ±         | -        | -     |
| sPBI-PO60  | +    | ±    | ±   | ±   | ±         | -        | -     |
| sPBI-PO70  | +    | ±    | ±   | ±   | ±         | -        | -     |
| sPBI-PO80  | +    | ±    | ±   | ±   | ±         | -        | -     |
| sPBI-PO90  | +    | ±    | ±   | ±   | ±         | -        | -     |
| sPBI-PO100 | ±    | ±    | ±   | ±   | ±         | -        | -     |

+: soluble when heated; ±: partially dissolved or swollen when heated; -: insoluble when heated.

**Table S4** Proton conductivity and mechanical properties of sPBI-PO membranes.

| Membranes | Proton conductivity |       | Mechanical properties  |                       |                         |
|-----------|---------------------|-------|------------------------|-----------------------|-------------------------|
|           | mS/cm               |       | Tensile strength (MPa) | Young's modulus (GPa) | Elongation at break (%) |
|           | 30 °C               | 80 °C |                        |                       |                         |
| sPBI-PO60 | 0.9                 | 4.6   | 60.01                  | 1.56                  | 16.22                   |
| sPBI-PO70 | 1.0                 | 4.9   | 45.10                  | 1.87                  | 6.57                    |
| sPBI-PO80 | 1.1                 | 6.5   | 43.31                  | 1.81                  | 4.93                    |
| sPBI-PO90 | 1.7                 | 7.1   | 53.25                  | 1.39                  | 15.21                   |

**Table S5** PA uptake and Volume swelling ratio of membrane.

| Membrane     | PA doping level (mol/mol) | PA uptake (%) | Volume swelling ratio (%) |
|--------------|---------------------------|---------------|---------------------------|
| sPBI-PO60-PA | 25.4                      | 153.7         | 184.1                     |
| sPBI-PO70-PA | 29.7                      | 162.2         | 190.7                     |
| sPBI-PO80-PA | 32.3                      | 175.9         | 178.3                     |
| sPBI-PO90-PA | 34.9                      | 187.3         | 170.6                     |
